# Supplementary material for: Characteristics of Mussels-Derived Carbon Dots and Their Applications in Bio-Imaging and Detection of Riboflavin
Source: MDPI journal article supplement (doi:10.3390/foods11162451), 2022-08-14
Supplement: s1 [file s1]

**Characteristics of mussels-derived carbon dots and their applications in  
bio-imaging and detection of riboflavin**

Wenyu Zhao, Yi Zhang, Bin Cao, Zhuoyan Li, Chengfeng Sun, Xiaolin Cao, Shuang  
Cong\*

*College of Life Sciences, Yantai University, Yantai 264005, Shandong, China*

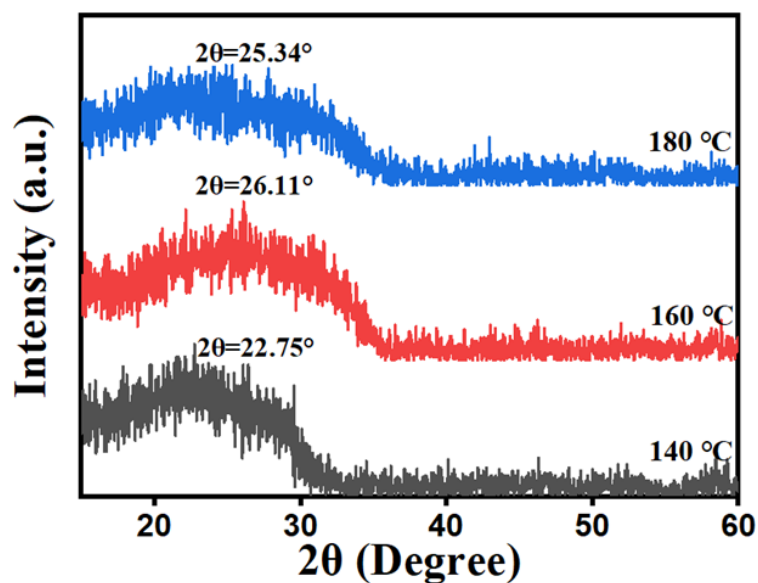

**Figure S1.** XRD pattern of mussels-derived CDs.

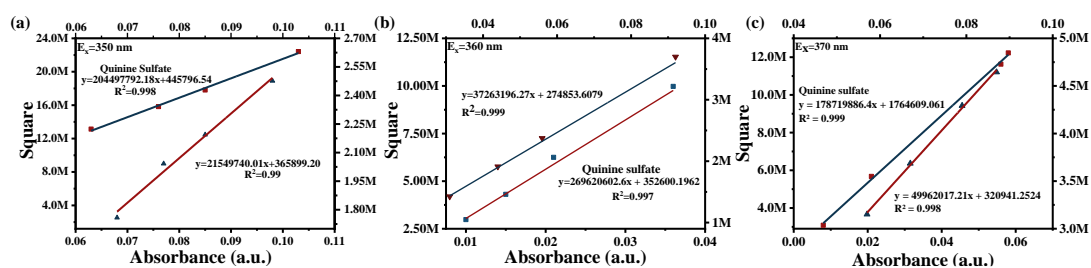

**Figure S2.** Fluorescence quantum yield of quinine sulfate and mussels-derived CDs prepared at (a) 140 °C, (b) 160 °C, and (c) 180 °C.

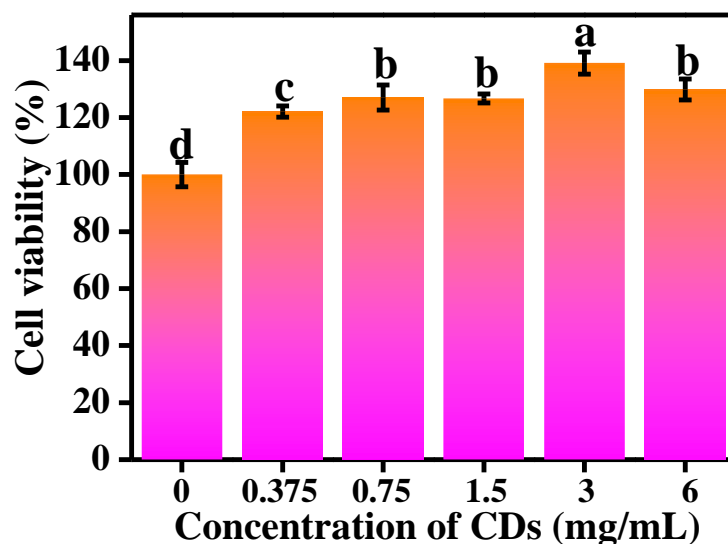

**Figure S3.** Cell viability of HepG2 cells after incubation with different concentrations of CDs for 24 h. Different lowercase letters (a–d) represent significant difference ( $p < 0.05$ ).

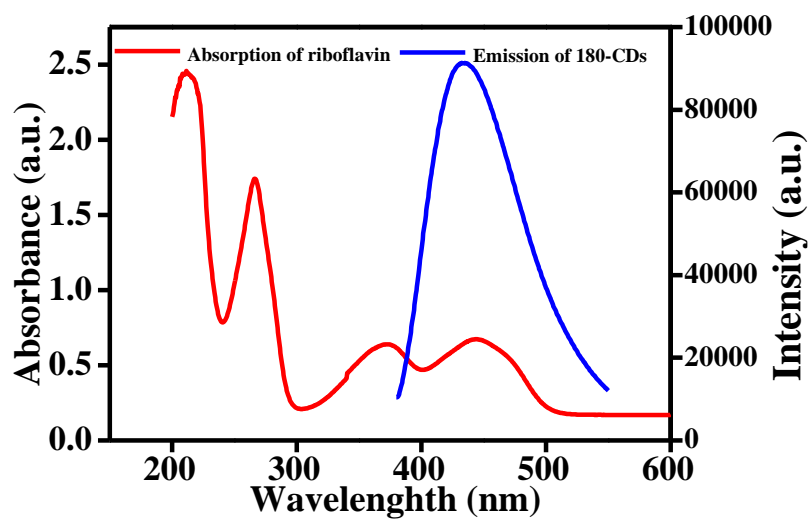

**Figure S4.** UV-vis absorption spectrum of riboflavin and fluorescence emission spectrum of 180-CDs.

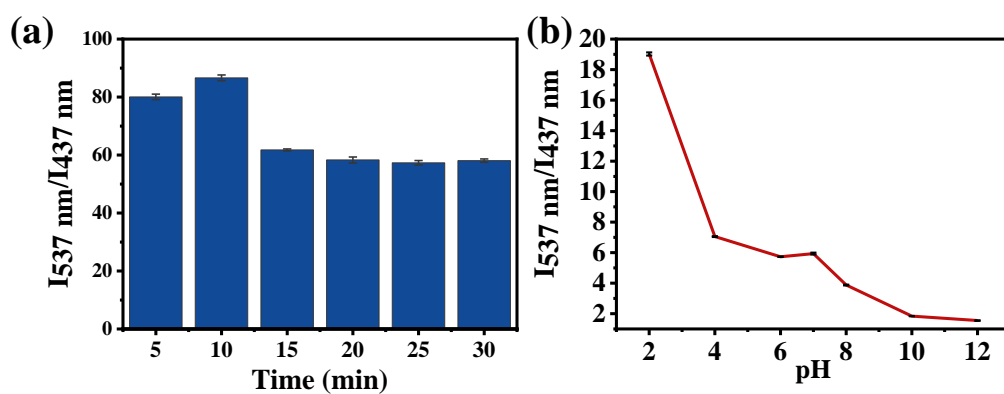

**Figure S5.** (a) Effects of the reaction time, and (b) pH on the detection of riboflavin between CDs and riboflavin.
